# Supplementary material for: Binding of ligands containing carbonyl and phenol groups to iron(iii): new Fe6, Fe10and Fe12coordination clusters
Source: Royal Society of Chemistry journal article supplement (doi:10.1039/c6dt04830g), 2017-01-01
Supplement: c6dt04830g1.pdf [file c6dt04830g1.pdf]

Electronic Supplementary Information

to

**Binding of ligands containing carbonyl and phenol groups to  
iron(III): New Fe<sub>6</sub>, Fe<sub>10</sub> and Fe<sub>12</sub> coordination clusters**

Alexandros A. Kitos,<sup>a</sup> Constantina Papatriantafyllopoulou,<sup>b,c</sup> Anastasios J. Tasiopoulos,<sup>b</sup>  
Spyros P. Perlepes,<sup>a</sup> Albert Escuer<sup>d</sup> and Vassilios Nastopoulos<sup>a</sup>

---

<sup>a.</sup> Department of Chemistry, University of Patras, 26504 Patras, Greece. E-mail: nastopoulos@chemistry.upatras.gr

<sup>b.</sup> Department of Chemistry, University of Cyprus, 1678 Nicosia, Cyprus

<sup>c.</sup> School of Chemistry, National University of Ireland Galway, Galway, Ireland

<sup>d.</sup> Departament de Química Inorgànica i Orgànica, seccio Inorgànica and Institute of Nanoscience and Nanotechnology (IN2UB), Universitat de Barcelona, Diagonal 645, 08028 Barcelona, Spain. E-mail: albert.escuer@qi.ub.es

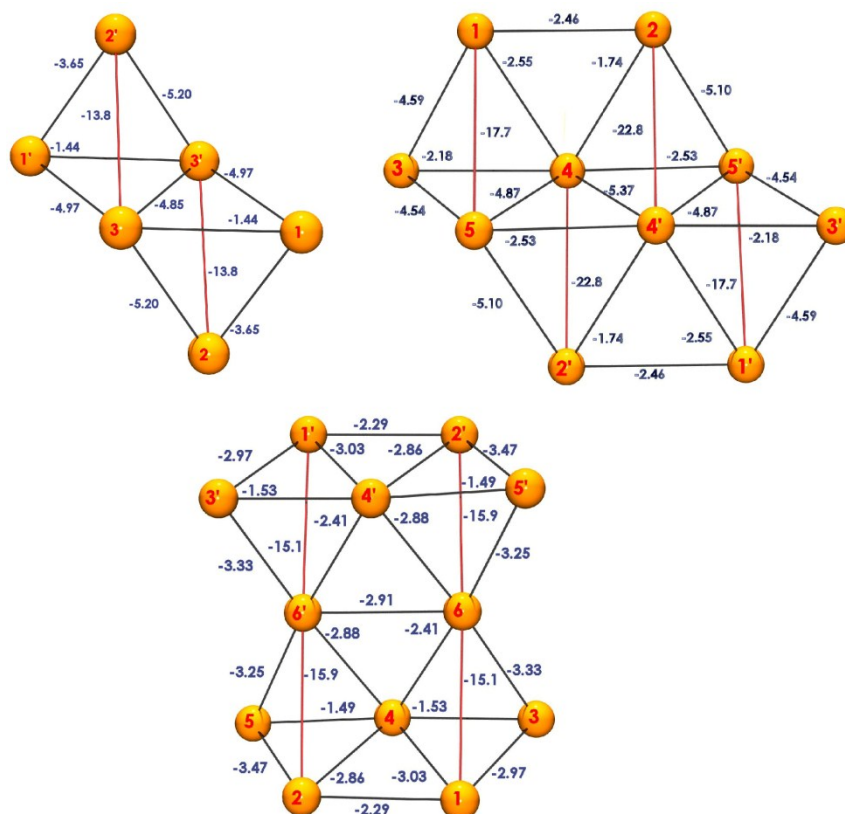

**Fig. S1** Prediction of the  $J$  values for clusters **2** (bottom), **3** (up right) and **5** (up left) employing the approach of Christou.<sup>53</sup> The model confirms unambiguously the stronger antiferromagnetic interactions mediated by the Fe-O-Fe pathways with short Fe-O bond distances and large bond angles. For the hexanuclear cluster **5**, the  $S=5$  ground state can be inferred from the  $J$  values and it is confirmed by the fit of the reduced magnetization plots (Fig. 5, right) and by the  $\chi_M T$  vs.  $T$  simulation applying the  $J$  values calculated with Christou's model.<sup>53</sup> In contrast, no reliable predictions of the ground-state spin  $S$  can be made for **2** and **3** due to the similar  $J$  value for most interactions and to the triangular arrangements of the Fe<sup>III</sup> atoms.

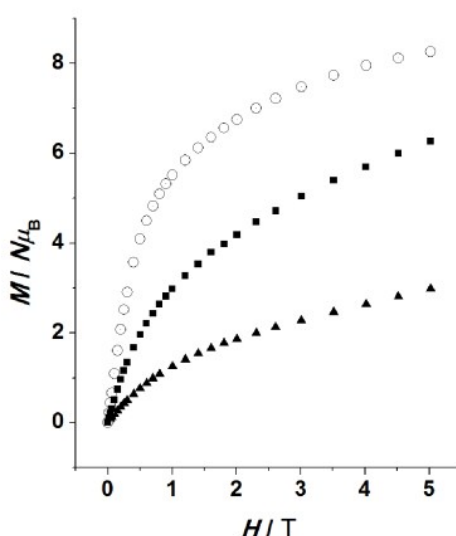

**Fig. S2** Magnetization plots for **5** (circles), **3** (solid triangles) and **2** (solid squares) at 2 K.

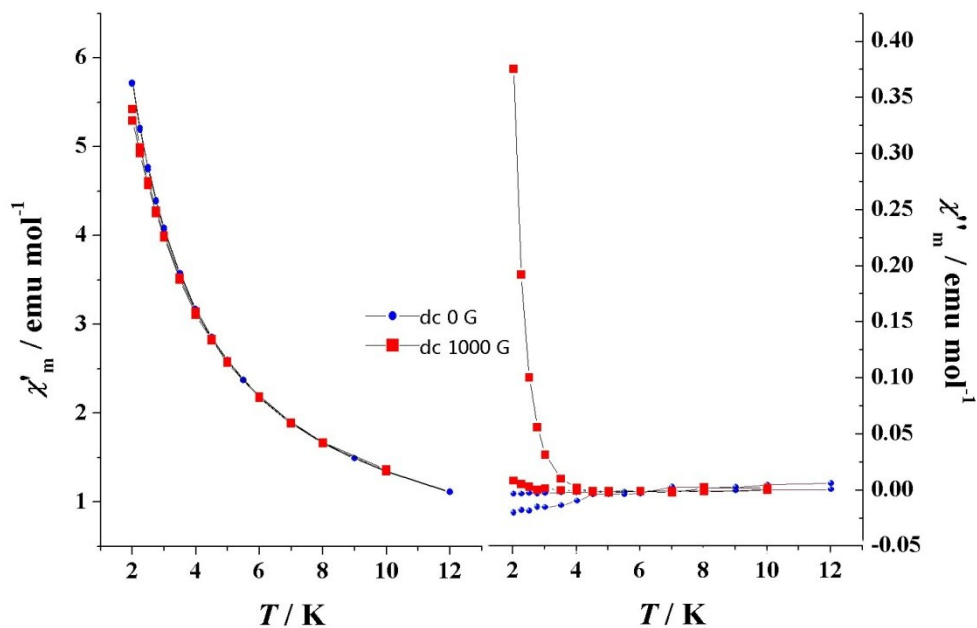

**Fig. S3** In-phase ( $\chi'_M$ ) and out-of-phase ( $\chi''_M$ ) ac magnetic susceptibilities for complex **5** as a function of temperature in zero and applied dc field of 0.1 T. Ac frequencies: 10 and 1000 Hz.

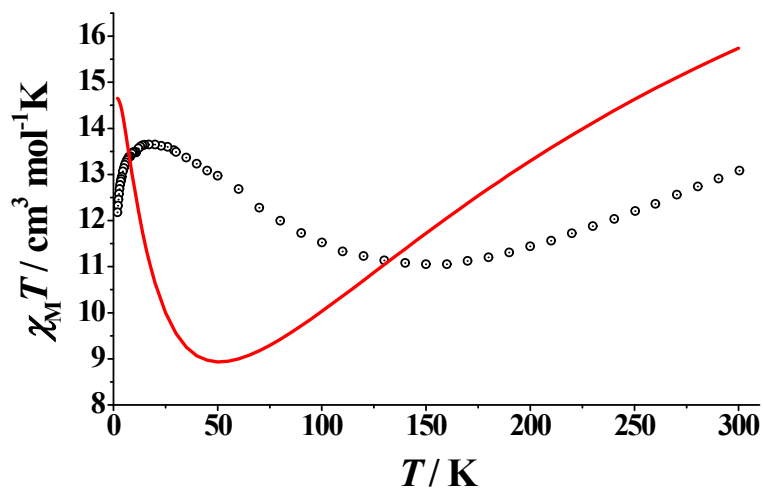

**Fig. S4** Simulation of the  $\chi_M T$  vs.  $T$  product for compound **5** applying the  $J$  values calculated with Christou's model.<sup>53</sup> The model predicts correctly the  $S=5$  ground state and the ferrimagnetic response of the complex. The position of the  $\chi_M T$  minimum at a lower temperature with respect to the experimental data (circles) suggests that the interaction mediated by the larger Fe-O-Fe angles is sub-estimated.

**Table S1** Selected interatomic distances (Å) and angles (°) for compounds **1**·3MeOH, **3** and **4**·MeOH.

| 1·3MeOH     | Distance/angle | Symmetry code |             | Distance/angle | Symmetry code |
|-------------|----------------|---------------|-------------|----------------|---------------|
| Fe1-Fe2     | 3.202(3)       | x, y, z       | Fe1-Fe3     | 3.078(4)       | x, y, z       |
| Fe1-Fe4     | 3.160(3)       | x, y, z       | Fe2-Fe4     | 3.154(4)       | x, y, z       |
| Fe2-Fe5     | 3.069(3)       | x, y, z       | Fe3-Fe4     | 3.116(3)       | x, y, z       |
| Fe4-Fe5     | 3.099(3)       | x, y, z       | Fe4-Fe4'    | 3.038(3)       | -x, 1-y, 1-z  |
| Fe4-Fe5'    | 3.022(3)       | -x, 1-y, 1-z  | Fe5-Fe3'    | 3.155(3)       | -x, 1-y, 1-z  |
| Fe1-O1B     | 1.925(2)       | x, y, z       | Fe3-O12     | 1.999(2)       | x, y, z       |
| Fe1-O3      | 1.961(2)       | x, y, z       | Fe3-O2A     | 2.096(2)       | x, y, z       |
| Fe1-O6      | 1.974 (3)      | x, y, z       | Fe3-O3      | 2.118(3)       | x, y, z       |
| Fe1-O5      | 2.020(3)       | x, y, z       | Fe4-O12     | 1.942(3)       | x, y, z       |
| Fe1-O2B     | 2.089(2)       | x, y, z       | Fe4-O11     | 1.957(2)       | x, y, z       |
| Fe1-O8      | 2.133(2)       | x, y, z       | Fe4-O4      | 1.965(2)       | -x, 1-y, 1-z  |
| Fe2-O1C     | 1.912(3)       | x, y, z       | Fe4-O4      | 2.087(3)       | x, y, z       |
| Fe2-O4      | 1.966(2)       | x, y, z       | Fe4-O3      | 2.098(2)       | x, y, z       |
| Fe2-O6      | 1.978 (2)      | x, y, z       | Fe4-O8      | 2.100(2)       | x, y, z       |
| Fe2-O7      | 2.014(2)       | x, y, z       | Fe5-O3      | 1.979(2)       | -x, 1-y, 1-z  |
| Fe2-O2C     | 2.053(2)       | x, y, z       | Fe5-O9      | 1.985(3)       | x, y, z       |
| Fe2-O8      | 2.132(3)       | x, y, z       | Fe5-O7      | 1.993(2)       | x, y, z       |
| Fe3-O1A     | 1.903 (3)      | x, y, z       | Fe5-O11     | 2.025(3)       | x, y, z       |
| Fe3-O9      | 1.967(2)       | -x, 1-y, 1-z  | Fe5-O10     | 2.032(2)       | x, y, z       |
| Fe3-O5      | 1.975 (2)      | x, y, z       | Fe5-O4      | 2.049(2)       | x, y, z       |
| Fe1-O1B-O3  | 101.98(9)      | x, y, z       | Fe3-O5-O12  | 93.63(9)       | x, y, z       |
| Fe1-O1B-O6  | 96.38(8)       | x, y, z       | Fe3-O5-O2A  | 86.15(7)       | x, y, z       |
| Fe1-O1B-O5  | 96.80(9)       | x, y, z       | Fe3-O5-O3   | 79.02(8)       | x, y, z       |
| Fe1-O1B-O2B | 86.25(7)       | x, y, z       | Fe3-O12-O2A | 174.51(9)      | x, y, z       |
| Fe1-O1B-O8  | 173.07(9)      | x, y, z       | Fe3-O12-O3  | 79.17(7)       | x, y, z       |
| Fe1-O3-O6   | 98.20(7)       | x, y, z       | Fe3-O2A-O3  | 106.15(7)      | x, y, z       |
| Fe1-O3-O5   | 81.78(8)       | x, y, z       | Fe4-O12-O11 | 101.45(8)      | x, y, z       |
| Fe1-O3-O2B  | 169.05(10)     | x, y, z       | Fe4-O12-O4  | 101.63(1)      | -x, 1-y, 1-z  |
| Fe1-O3-O8   | 81.76(7)       | x, y, z       | Fe4-O12-O4  | 174.63(9)      | x, y, z       |
| Fe1-O6-O5   | 166.52(9)      | x, y, z       | Fe4-O12-O3  | 80.97(8)       | x, y, z       |
| Fe1-O6-O2B  | 87.92(8)       | x, y, z       | Fe4-O12-O8  | 94.99(7)       | x, y, z       |
| Fe1-O6-O8   | 77.21(7)       | x, y, z       | Fe4-O11-O4  | 96.99(8)       | -x, 1-y, 1-z  |
| Fe1-O5-O2B  | 90.15(7)       | x, y, z       | Fe4-O11-O4  | 80.69(8)       | x, y, z       |
| Fe1-O5-O8   | 89.48(7)       | x, y, z       | Fe4-O11-O3  | 177.54(9)      | x, y, z       |
| Fe1-O2B-O8  | 90.83(8)       | x, y, z       | Fe4-O11-O8  | 99.84(9)       | x, y, z       |
| Fe2-O1C-O4  | 102.03(8)      | x, y, z       | Fe4-O4-O4   | 82.90(7)       | x, y, z       |
| Fe2-O1C-O6  | 95.03(8)       | x, y, z       | Fe4-O4-O3   | 82.90(8)       | x, y, z       |
| Fe2-O1C-O7  | 97.91(9)       | x, y, z       | Fe4-O4-O8   | 153.46(9)      | x, y, z       |
| Fe2-O1C-O2C | 86.93(9)       | x, y, z       | Fe4-O4-O3   | 96.86(7)       | x, y, z       |
| Fe2-O1C-O8  | 171.77(9)      | x, y, z       | Fe4-O4-O8   | 79.76(8)       | x, y, z       |
| Fe2-O4-O6   | 97.59(9)       | x, y, z       | Fe4-O3-O8   | 79.42(7)       | x, y, z       |
| Fe2-O4-O7   | 80.31(7)       | x, y, z       | Fe5-O3-O9   | 77.96(7)       | x, y, z       |
| Fe2-O4-O2C  | 166.90(9)      | x, y, z       | Fe5-O3-O7   | 158.18(10)     | x, y, z       |
| Fe2-O4-O8   | 81.78(8)       | x, y, z       | Fe5-O3-O11  | 96.31(9)       | x, y, z       |
| Fe2-O6-O7   | 167.05(9)      | x, y, z       | Fe5-O3-O10  | 105.91(8)      | x, y, z       |
| Fe2-O6-O2C  | 91.04(7)       | x, y, z       | Fe5-O3-O4   | 83.83(8)       | x, y, z       |
| Fe2-O6-O8   | 77.15(7)       | x, y, z       | Fe5-O9-O7   | 91.83(9)       | x, y, z       |
| Fe2-O7-O2C  | 89.07(8)       | x, y, z       | Fe5-O9-O11  | 174.27(9)      | x, y, z       |
| Fe2-O7-O8   | 89.90(7)       | x, y, z       | Fe5-O9-O10  | 93.79(9)       | x, y, z       |
| Fe2-O2C-O8  | 90.62(7)       | x, y, z       | Fe5-O9-O4   | 99.38(7)       | x, y, z       |
| Fe3-O1A-O9  | 105.57(10)     | -x, 1-y, 1-z  | Fe5-O7-O11  | 93.65(7)       | x, y, z       |
| Fe3-O1A-O5  | 103.33(8)      | x, y, z       | Fe5-O7-O10  | 93.85(9)       | x, y, z       |
| Fe3-O1A-O12 | 89.78(8)       | x, y, z       | Fe5-O7-O4   | 78.83(7)       | x, y, z       |
| Fe3-O1A-O2A | 84.94(8)       | x, y, z       | Fe5-O11-O10 | 87.53(7)       | x, y, z       |
| Fe3-O1A-O3  | 168.85(10)     | x, y, z       | Fe5-O11-O4  | 80.06(8)       | x, y, z       |
| Fe3-O9-O5   | 148.38(9)      | x, y, z       | Fe5-O10-O4  | 165.07(9)      | x, y, z       |
| Fe3-O9-O12  | 99.03(8)       | x, y, z       | Fe3-O9-O3   | 75.13(7)       | x, y, z       |
| Fe3-O9-O2A  | 83.87(8)       | x, y, z       |             |                |               |

| 3           | Distance/angle | Symmetry code | Distance/angle | Symmetry code |              |
|-------------|----------------|---------------|----------------|---------------|--------------|
| Fe1-Fe2     | 3.191(3)       | x, y, z       | Fe4-Fe4'       | 3.021(3)      | -x, 1-y, 1-z |
| Fe1-Fe3     | 3.105(3)       | x, y, z       | Fe4-Fe5'       | 3.052(3)      | -x, 1-y, 1-z |
| Fe1-Fe4     | 3.160(4)       | x, y, z       | Fe4-Fe3        | 3.089(3)      | x, y, z      |
| Fe2-Fe4     | 3.143(3)       | x, y, z       | Fe4-Fe5        | 3.134(3)      | x, y, z      |
| Fe2-Fe5     | 3.079(3)       | x, y, z       | Fe5-Fe3'       | 3.114(3)      | -x, 1-y, 1-z |
| Fe1-O3      | 1.973(2)       | x, y, z       | Fe3-O12        | 2.014(2)      | x, y, z      |
| Fe1-O5      | 1.986(2)       | x, y, z       | Fe3-O2A        | 2.090(2)      | x, y, z      |
| Fe1-O6      | 1.990(2)       | x, y, z       | Fe3-O3         | 2.110(2)      | x, y, z      |
| Fe1-O8      | 2.080(2)       | x, y, z       | Fe4-O4         | 1.943(2)      | -x, 1-y, 1-z |
| Fe1-O10     | 2.084(2)       | x, y, z       | Fe4-O12        | 1.944(2)      | x, y, z      |
| Fe1-Cl1     | 2.310(2)       | x, y, z       | Fe4-O11        | 1.972(2)      | -x, 1-y, 1-z |
| Fe2-O1B     | 1.918(2)       | x, y, z       | Fe4-O3         | 2.068(2)      | x, y, z      |
| Fe2-O4      | 1.945(2)       | x, y, z       | Fe4-O4         | 2.076(2)      | x, y, z      |
| Fe2-O6      | 1.991(2)       | x, y, z       | Fe4-O8         | 2.106(2)      | x, y, z      |
| Fe2-O7      | 2.018(2)       | -x, 1-y, 1-z  | Fe5-O3         | 1.973(2)      | x, y, z      |
| Fe2-O2B     | 2.052(2)       | x, y, z       | Fe5-O7         | 1.992(2)      | x, y, z      |
| Fe2-O8      | 2.129(2)       | x, y, z       | Fe5-O9         | 1.999(2)      | x, y, z      |
| Fe3-O1A     | 1.911(2)       | x, y, z       | Fe5-O11        | 2.038(2)      | x, y, z      |
| Fe3-O9      | 1.948(2)       | x, y, z       | Fe5-O4         | 2.107(2)      | -x, 1-y, 1-z |
| Fe3-O5      | 1.980(2)       | x, y, z       | Fe5-Cl2        | 2.336(3)      | x, y, z      |
| Fe1-O3-O5   | 80.4(7)        | x, y, z       | Fe3-O5-O12     | 94.93(7)      | x, y, z      |
| Fe1-O3-O6   | 95.6(8)        | x, y, z       | Fe3-O5-O2A     | 83.57(6)      | x, y, z      |
| Fe1-O3-O8   | 80.97(6)       | x, y, z       | Fe3-O5-O3      | 77.30(7)      | x, y, z      |
| Fe1-O3-O10  | 85.72(7)       | x, y, z       | Fe3-O12-O2A    | 176.41(6)     | x, y, z      |
| Fe1-O3-Cl1  | 171.94(9)      | x, y, z       | Fe3-O12-O3     | 79.65(6)      | x, y, z      |
| Fe1-O5-O6   | 168.83(8)      | x, y, z       | Fe3-O2A-O3     | 103.14(5)     | x, y, z      |
| Fe1-O5-O8   | 91.02(6)       | x, y, z       | Fe4-O4-O12     | 102.29(8)     | x, y, z      |
| Fe1-O5-O10  | 97.65(8)       | x, y, z       | Fe4-O4-O11     | 98.87(7)      | -x, 1-y, 1-z |
| Fe1-O5-Cl1  | 91.82(8)       | x, y, z       | Fe4-O4-O3      | 82.98(6)      | x, y, z      |
| Fe1-O6-O8   | 78.02(6)       | x, y, z       | Fe4-O4-O4      | 82.57(7)      | x, y, z      |
| Fe1-O6-O10  | 92.41(6)       | x, y, z       | Fe4-O4-O8      | 152.23(10)    | x, y, z      |
| Fe1-O6-Cl1  | 92.47(6)       | x, y, z       | Fe4-O12-O11    | 99.95(6)      | -x, 1-y, 1-z |
| Fe1-O8-O10  | 162.70(7)      | x, y, z       | Fe4-O12-O3     | 82.30(7)      | x, y, z      |
| Fe1-O8-Cl1  | 101.54(6)      | x, y, z       | Fe4-O12-O4     | 174.72(8)     | x, y, z      |
| Fe1-O10-Cl1 | 93.16(7)       | x, y, z       | Fe4-O12-O8     | 95.26(8)      | x, y, z      |
| Fe2-O1B-O4  | 104.01(9)      | x, y, z       | Fe4-O11-O3     | 176.67(7)     | x, y, z      |
| Fe2-O1B-O6  | 95.72(6)       | x, y, z       | Fe4-O11-O4     | 81.16(7)      | x, y, z      |
| Fe2-O1B-O7  | 97.35(8)       | -x, 1-y, 1-z  | Fe4-O11-O8     | 99.09(7)      | x, y, z      |
| Fe2-O1B-O2B | 86.77(7)       | x, y, z       | Fe4-O3-O4      | 96.39(5)      | x, y, z      |
| Fe2-O1B-O8  | 171.03(8)      | x, y, z       | Fe4-O3-O8      | 78.20(6)      | x, y, z      |
| Fe2-O4-O6   | 94.78(7)       | x, y, z       | Fe4-O4-O8      | 79.47(6)      | x, y, z      |
| Fe2-O4-O7   | 81.25(7)       | -x, 1-y, 1-z  | Fe5-O3-O7      | 156.09(10)    | x, y, z      |
| Fe2-O4-O2B  | 166.43(10)     | x, y, z       | Fe5-O3-O9      | 79.23(7)      | x, y, z      |
| Fe2-O4-O8   | 81.87(7)       | x, y, z       | Fe5-O3-O11     | 97.16(7)      | x, y, z      |
| Fe2-O6-O7   | 166.90(7)      | -x, 1-y, 1-z  | Fe5-O3-O4      | 81.28(6)      | -x, 1-y, 1-z |
| Fe2-O6-O2B  | 92.28(7)       | x, y, z       | Fe5-O3-Cl2     | 99.67(7)      | x, y, z      |
| Fe2-O6-O8   | 76.86(6)       | x, y, z       | Fe5-O7-O9      | 90.12(7)      | x, y, z      |
| Fe2-O7-O2B  | 89.31(7)       | x, y, z       | Fe5-O7-O11     | 90.43(7)      | x, y, z      |
| Fe2-O7-O8   | 90.19(5)       | x, y, z       | Fe5-O7-O4      | 77.99(6)      | -x, 1-y, 1-z |
| Fe2-O2B-O8  | 88.49(7)       | x, y, z       | Fe5-O7-Cl2     | 102.35(6)     | x, y, z      |
| Fe3-O1A-O9  | 103.22(8)      | x, y, z       | Fe5-O9-O11     | 171.72(8)     | x, y, z      |
| Fe3-O1A-O5  | 104.28(9)      | x, y, z       | Fe5-O9-O4      | 93.14(5)      | -x, 1-y, 1-z |
| Fe3-O1A-O12 | 92.61(6)       | x, y, z       | Fe5-O9-Cl2     | 93.74(7)      | x, y, z      |
| Fe3-O1A-O2A | 84.63(7)       | x, y, z       | Fe5-O11-O4     | 78.90(6)      | -x, 1-y, 1-z |

|               |                       |                      |                       |                      |               |
|---------------|-----------------------|----------------------|-----------------------|----------------------|---------------|
| Fe3-O1A-O3    | 172.22(8)             | x, y, z              | Fe5-O11-Cl2           | 94.22(5)             | x, y, z       |
| Fe3-O9-O5     | 149.85(10)            | x, y, z              | Fe5-O4-Cl2            | 173.11(6)            | x, y, z       |
| Fe3-O9-O12    | 95.94(7)              | x, y, z              | Fe3-O9-O2A            | 86.93(6)             | x, y, z       |
| Fe3-O9-O3     | 77.13(7)              | x, y, z              |                       |                      |               |
| <b>4-MeOH</b> | <b>Distance/angle</b> | <b>Symmetry code</b> | <b>Distance/angle</b> | <b>Symmetry code</b> |               |
| Fe1-Fe2       | 3.169(3)              | x, y, z              | Fe4-Fe4'              | 2.989(3)             | -x, 1-y, 1-z  |
| Fe1-Fe3       | 3.103(3)              | x, y, z              | Fe4-Fe5'              | 3.029(5)             | -x, 1-y, 1-z  |
| Fe1-Fe4       | 3.163(2)              | x, y, z              | Fe4-Fe3               | 3.104(3)             | x, y, z       |
| Fe2-Fe4       | 3.123(4)              | x, y, z              | Fe4-Fe5               | 3.097(3)             | x, y, z       |
| Fe2-Fe5       | 3.092(2)              | x, y, z              | Fe5-Fe3'              | 3.173(3)             | -x, 1-y, 1-z  |
| Fe1-O1B       | 1.909(2)              | x, y, z              | Fe3-O12               | 2.005(2)             | 1-x, 2-y, 1-z |
| Fe1-O3        | 1.938(2)              | 1-x, 2-y, 1-z        | Fe3-O2C               | 2.118(2)             | x, y, z       |
| Fe1-O6        | 1.979(2)              | x, y, z              | Fe3-O3                | 2.143(2)             | x, y, z       |
| Fe1-O5        | 2.004(2)              | x, y, z              | Fe4-O12               | 1.937(1)             | x, y, z       |
| Fe1-O2B       | 2.057(3)              | x, y, z              | Fe4-O4                | 1.961(3)             | 1-x, 2-y, 1-z |
| Fe1-O8        | 2.149(2)              | x, y, z              | Fe4-O11               | 1.966(2)             | x, y, z       |
| Fe2-O1A       | 1.927(3)              | x, y, z              | Fe4-O4                | 2.063(2)             | x, y, z       |
| Fe2-O4        | 1.975(2)              | x, y, z              | Fe4-O3                | 2.089(2)             | 1-x, 2-y, 1-z |
| Fe2-O6        | 1.985(2)              | x, y, z              | Fe4-O8                | 2.117(3)             | x, y, z       |
| Fe2-O7        | 2.010(2)              | x, y, z              | Fe5-O3                | 1.954(3)             | x, y, z       |
| Fe2-O2A       | 2.016(2)              | x, y, z              | Fe5-O7                | 1.977(2)             | x, y, z       |
| Fe2-O8        | 2.049(2)              | x, y, z              | Fe5-O9                | 2.007(2)             | x, y, z       |
| Fe3-O1C       | 1.910(2)              | x, y, z              | Fe5-O11               | 2.027(2)             | x, y, z       |
| Fe3-O5        | 1.951(3)              | 1-x, 2-y, 1-z        | Fe5-O4                | 2.054(2)             | x, y, z       |
| Fe3-O9        | 1.965(3)              | x, y, z              | Fe5-N                 | 2.116(2)             | x, y, z       |
| Fe1-O1B-O3    | 102.16(8)             | 1-x, 2-y, 1-z        | Fe3-O9-O12            | 100.37(8)            | 1-x, 2-y, 1-z |
| Fe1-O1B-O6    | 97.21(8)              | x, y, z              | Fe3-O9-O2C            | 83.91(8)             | x, y, z       |
| Fe1-O1B-O5    | 97.61(8)              | x, y, z              | Fe3-O9-O3             | 74.40(7)             | x, y, z       |
| Fe1-O1B-O2B   | 86.60(8)              | x, y, z              | Fe3-O12-O2C           | 170.68(10)           | x, y, z       |
| Fe1-O1B-O8    | 173.35(1)             | x, y, z              | Fe3-O12-O3            | 79.44(7)             | x, y, z       |
| Fe1-O3-O6     | 97.86(8)              | x, y, z              | Fe3-O2C-O3            | 109.77(8)            | x, y, z       |
| Fe1-O3-O5     | 80.53(7)              | x, y, z              | Fe4-O12-O4            | 102.15(9)            | 1-x, 2-y, 1-z |
| Fe1-O3-O2B    | 165.90(9)             | x, y, z              | Fe4-O12-O11           | 98.98(9)             | x, y, z       |
| Fe1-O3-O8     | 81.72(7)              | x, y, z              | Fe4-O12-O4            | 173.65(9)            | x, y, z       |
| Fe1-O6-O5     | 165.09(9)             | x, y, z              | Fe4-O12-O3            | 82.32(7)             | 1-x, 2-y, 1-z |
| Fe1-O6-O2B    | 91.89(8)              | x, y, z              | Fe4-O12-O8            | 94.84(7)             | x, y, z       |
| Fe1-O6-O8     | 76.79(7)              | x, y, z              | Fe4-O4-O11            | 99.07(8)             | x, y, z       |
| Fe1-O5-O2B    | 87.42(7)              | x, y, z              | Fe4-O4-O4             | 84.10(7)             | x, y, z       |
| Fe1-O5-O8     | 88.32(8)              | x, y, z              | Fe4-O4-O3             | 82.04(7)             | 1-x, 2-y, 1-z |
| Fe1-O2B-O8    | 90.69(7)              | x, y, z              | Fe4-O4-O8             | 152.60(9)            | x, y, z       |
| Fe2-O1A-O4    | 172.55(9)             | x, y, z              | Fe4-O11-O4            | 80.94(7)             | x, y, z       |
| Fe2-O1A-O6    | 92.93(8)              | x, y, z              | Fe4-O11-O3            | 178.05(10)           | 1-x, 2-y, 1-z |
| Fe2-O1A-O7    | 93.22(8)              | x, y, z              | Fe4-O11-O8            | 99.32(8)             | x, y, z       |
| Fe2-O1A-O2A   | 86.88(8)              | x, y, z              | Fe4-O4-O3             | 97.61(8)             | 1-x, 2-y, 1-z |
| Fe2-O1A-O8    | 97.94(7)              | x, y, z              | Fe4-O4-O8             | 78.94(7)             | x, y, z       |
| Fe2-O4-O6     | 94.47(8)              | x, y, z              | Fe4-O3-O8             | 79.09(7)             | x, y, z       |
| Fe2-O4-O7     | 79.33(7)              | x, y, z              | Fe5-O3-O7             | 156.59(9)            | x, y, z       |
| Fe2-O4-O2A    | 93.85(7)              | x, y, z              | Fe5-O3-O9             | 77.77(7)             | x, y, z       |
| Fe2-O4-O8     | 82.64(7)              | x, y, z              | Fe5-O3-O11            | 97.03(8)             | x, y, z       |
| Fe2-O6-O7     | 170.87(10)            | x, y, z              | Fe5-O3-O4             | 83.12(8)             | x, y, z       |
| Fe2-O6-O2A    | 91.02(8)              | x, y, z              | Fe5-O3-N              | 103.19(8)            | x, y, z       |
| Fe2-O6-O8     | 79.02(7)              | x, y, z              | Fe5-O7-O9             | 91.05(8)             | x, y, z       |
| Fe2-O7-O2A    | 96.04(8)              | x, y, z              | Fe5-O7-O11            | 93.43(7)             | x, y, z       |
| Fe2-O7-O8     | 93.46(8)              | x, y, z              | Fe5-O7-O4             | 78.22(7)             | x, y, z       |
| Fe2-O2A-O8    | 169.10(9)             | x, y, z              | Fe5-O7-N              | 97.85(8)             | x, y, z       |

|             |           |               |            |           |         |
|-------------|-----------|---------------|------------|-----------|---------|
| Fe3-O1C-O5  | 106.50(8) | 1-x, 2-y, 1-z | Fe5-O9-O11 | 174.70(9) | x, y, z |
| Fe3-O1C-O9  | 106.49(9) | x, y, z       | Fe5-O9-O4  | 98.46(8)  | x, y, z |
| Fe3-O1C-O12 | 87.42(8)  | 1-x, 2-y, 1-z | Fe5-O9-N   | 93.14(7)  | x, y, z |
| Fe3-O1C-O2C | 83.41(7)  | x, y, z       | Fe5-O11-O4 | 79.72(7)  | x, y, z |
| Fe3-O1C-O3  | 166.73(9) | x, y, z       | Fe5-O11-N  | 89.05(8)  | x, y, z |
| Fe3-O5-O9   | 143.96(9) | x, y, z       | Fe5-O4-N   | 167.79(9) | x, y, z |
| Fe3-O5-O12  | 95.20(8)  | 1-x, 2-y, 1-z | Fe3-O5-O2C | 85.83(7)  | x, y, z |
| Fe3-O5-O3   | 76.84(7)  | x, y, z       |            |           |         |

**Table S2** Selected interatomic distances (Å) and angles (°) for compound **2**·2H<sub>2</sub>O.

|             | Distance/angle | Symmetry code |             | Distance/angle | Symmetry code |
|-------------|----------------|---------------|-------------|----------------|---------------|
| Fe1-Fe2     | 3.217(2)       | x, y, z       | Fe3-Fe4     | 3.075(2)       | x, y, z       |
| Fe1-Fe3     | 3.086(2)       | x, y, z       | Fe3-Fe6     | 3.117(2)       | x, y, z       |
| Fe1-Fe4     | 3.085(1)       | x, y, z       | Fe4-Fe6     | 3.120(2)       | x, y, z       |
| Fe2-Fe5     | 3.121(1)       | x, y, z       | Fe4-Fe6'    | 3.116(1)       | -x, 1-y, 1-z  |
| Fe2-Fe4     | 3.108(2)       | x, y, z       | Fe5-Fe6'    | 3.127(2)       | -x, 1-y, 1-z  |
| Fe6-Fe6'    | 3.345(2)       | -x, 1-y, 1-z  |             |                |               |
| Fe1-O1B     | 1.903(1)       | x, y, z       | Fe4-O9      | 1.944(1)       | x, y, z       |
| Fe1-O6      | 1.986(1)       | x, y, z       | Fe4-O11     | 1.945(1)       | x, y, z       |
| Fe1-O3      | 1.988(1)       | x, y, z       | Fe4-O7      | 2.024(1)       | x, y, z       |
| Fe1-O5      | 1.996(1)       | x, y, z       | Fe4-O10     | 2.049(1)       | x, y, z       |
| Fe1-O2B     | 2.058(1)       | x, y, z       | Fe4-O3      | 2.078(1)       | x, y, z       |
| Fe1-O7      | 2.108(1)       | x, y, z       | Fe4-O4      | 2.082(1)       | x, y, z       |
| Fe2-O1C     | 1.912(1)       | x, y, z       | Fe5-O1D     | 1.923(1)       | x, y, z       |
| Fe2-O4      | 1.978(1)       | x, y, z       | Fe5-O8      | 1.967(1)       | x, y, z       |
| Fe2-O6      | 1.988(1)       | x, y, z       | Fe5-O13     | 1.990(1)       | 1-x, 1-y, 1-z |
| Fe2-O8      | 1.994(1)       | x, y, z       | Fe5-O9      | 1.993(1)       | x, y, z       |
| Fe2-O2C     | 2.067(1)       | x, y, z       | Fe5-O2D     | 2.075(1)       | x, y, z       |
| Fe2-O7      | 2.126(1)       | x, y, z       | Fe5-O4      | 2.149(1)       | x, y, z       |
| Fe3-O1A     | 1.907(1)       | x, y, z       | Fe5-O12     | 1.966(1)       | x, y, z       |
| Fe3-O5      | 1.963(1)       | x, y, z       | Fe6-O13     | 1.970(1)       | x, y, z       |
| Fe3-O12     | 1.976(1)       | x, y, z       | Fe6-O4      | 1.992(1)       | 1-x, 1-y, 1-z |
| Fe3-O11     | 1.994(1)       | x, y, z       | Fe6-O3      | 1.992(1)       | x, y, z       |
| Fe3-O2A     | 2.083(1)       | x, y, z       | Fe6-O10     | 2.105(1)       | 1-x, 1-y, 1-z |
| Fe3-O3      | 2.142(1)       | x, y, z       | Fe6-O10     | 2.133(1)       | x, y, z       |
| Fe1-O1B-O6  | 96.08(5)       | x, y, z       | Fe4-O9-O10  | 98.87(6)       | x, y, z       |
| Fe1-O1B-O3  | 106.21(5)      | x, y, z       | Fe4-O9-O3   | 178.67(6)      | x, y, z       |
| Fe1-O1B-O5  | 96.96(5)       | x, y, z       | Fe4-O9-O4   | 82.79(5)       | x, y, z       |
| Fe1-O1B-O2B | 86.76(5)       | x, y, z       | Fe4-O11-O7  | 99.29(5)       | x, y, z       |
| Fe1-O1B-O7  | 169.51(6)      | x, y, z       | Fe4-O11-O10 | 98.75(5)       | x, y, z       |
| Fe1-O6-O3   | 96.40(5)       | x, y, z       | Fe4-O11-O3  | 83.25(5)       | x, y, z       |
| Fe1-O6-O5   | 166.85(6)      | x, y, z       | Fe4-O11-O4  | 178.17(6)      | x, y, z       |
| Fe1-O6-O2B  | 90.06(5)       | x, y, z       | Fe4-O7-O10  | 154.21(6)      | x, y, z       |
| Fe1-O6-O7   | 76.69(4)       | x, y, z       | Fe4-O7-O3   | 82.29(5)       | x, y, z       |
| Fe1-O3-O5   | 81.64(5)       | x, y, z       | Fe4-O7-O4   | 81.52(5)       | x, y, z       |
| Fe1-O3-O2B  | 164.72(6)      | x, y, z       | Fe4-O10-O3  | 81.70(5)       | x, y, z       |
| Fe1-O3-O7   | 82.40(5)       | x, y, z       | Fe4-O10-O4  | 81.00(5)       | x, y, z       |
| Fe1-O5-O2B  | 88.92(5)       | x, y, z       | Fe4-O3-O4   | 98.50(4)       | x, y, z       |
| Fe1-O5-O7   | 90.15(4)       | x, y, z       | Fe5-O1D-O8  | 99.51(5)       | x, y, z       |
| Fe1-O2B-O7  | 85.66(4)       | x, y, z       | Fe5-O1D-O13 | 108.97(6)      | 1-x, 1-y, 1-z |
| Fe2-O1C-O4  | 104.34(5)      | x, y, z       | Fe5-O1D-O9  | 88.95(5)       | x, y, z       |
| Fe2-O1C-O6  | 97.06(5)       | x, y, z       | Fe5-O1D-O2D | 84.94(5)       | x, y, z       |
| Fe2-O1C-O8  | 98.34(5)       | x, y, z       | Fe5-O1D-O4  | 167.85(6)      | x, y, z       |

|             |           |         |             |           |               |
|-------------|-----------|---------|-------------|-----------|---------------|
| Fe2-O1C-O2C | 86.12(5)  | x, y, z | Fe5-O8-O13  | 150.51(6) | 1-x, 1-y, 1-z |
| Fe2-O1C-O7  | 171.92(6) | x, y, z | Fe5-O8-O9   | 96.45(5)  | x, y, z       |
| Fe2-O4-O6   | 100.18(5) | x, y, z | Fe5-O8-O2D  | 88.45(5)  | x, y, z       |
| Fe2-O4-O8   | 80.53(5)  | x, y, z | Fe5-O8-O4   | 77.02(5)  | x, y, z       |
| Fe2-O4-O2C  | 165.31(6) | x, y, z | Fe5-O13-O9  | 91.66(5)  | x, y, z       |
| Fe2-O4-O7   | 81.52(5)  | x, y, z | Fe5-O13-O2D | 86.62(5)  | x, y, z       |
| Fe2-O6-O8   | 163.90(6) | x, y, z | Fe5-O13-O4  | 76.57(4)  | x, y, z       |
| Fe2-O6-O2C  | 88.52(5)  | x, y, z | Fe5-O9-O2D  | 172.73(5) | x, y, z       |
| Fe2-O6-O7   | 76.23(4)  | x, y, z | Fe5-O9-O4   | 79.97(4)  | x, y, z       |
| Fe2-O8-O2C  | 87.84(5)  | x, y, z | Fe5-O2D-O4  | 106.44(5) | x, y, z       |
| Fe2-O8-O7   | 88.04(4)  | x, y, z | Fe6-O12-O13 | 98.99(5)  | x, y, z       |
| Fe2-O2C-O7  | 89.19(4)  | x, y, z | Fe6-O12-O4  | 101.63(6) | 1-x, 1-y, 1-z |
| Fe3-O1A-O5  | 103.84(5) | x, y, z | Fe6-O12-O3  | 80.61(5)  | x, y, z       |
| Fe3-O1A-O12 | 101.84(6) | x, y, z | Fe6-O12-O10 | 167.59(6) | 1-x, 1-y, 1-z |
| Fe3-O1A-O11 | 92.42(5)  | x, y, z | Fe6-O12-O10 | 92.06(4)  | x, y, z       |
| Fe3-O1A-O2A | 85.37(5)  | x, y, z | Fe6-O13-O4  | 80.82(5)  | 1-x, 1-y, 1-z |
| Fe3-O1A-O3  | 172.64(6) | x, y, z | Fe6-O13-O3  | 104.28(6) | x, y, z       |
| Fe3-O5-O12  | 153.28(6) | x, y, z | Fe6-O13-O10 | 93.33(5)  | 1-x, 1-y, 1-z |
| Fe3-O5-O11  | 92.09(5)  | x, y, z | Fe6-O13-O10 | 168.14(6) | x, y, z       |
| Fe3-O5-O2A  | 86.53(5)  | x, y, z | Fe6-O4-O3   | 174.14(7) | x, y, z       |
| Fe3-O5-O3   | 78.63(5)  | x, y, z | Fe6-O4-O10  | 81.78(5)  | 1-x, 1-y, 1-z |
| Fe3-O12-O11 | 94.11(5)  | x, y, z | Fe6-O4-O10  | 92.80(5)  | x, y, z       |
| Fe3-O12-O2A | 88.30(5)  | x, y, z | Fe6-O3-O10  | 94.91(5)  | 1-x, 1-y, 1-z |
| Fe3-O12-O3  | 76.80(4)  | x, y, z | Fe6-O3-O10  | 81.66(5)  | x, y, z       |
| Fe3-O11-O2A | 177.02(6) | x, y, z | Fe6-O10-O10 | 75.78(4)  | x, y, z       |
| Fe3-O11-O3  | 80.52(4)  | x, y, z | Fe4-O9-O11  | 95.46(5)  | x, y, z       |
| Fe3-O2A-O3  | 101.77(4) | x, y, z | Fe4-O9-O7   | 97.59(5)  | x, y, z       |

**Table S3** Selected interatomic distances (Å) and angles (°) for compound **5**.

|             | Distance/angle | Symmetry code |             | Distance/angle | Symmetry code |
|-------------|----------------|---------------|-------------|----------------|---------------|
| Fe1-Fe2     | 2.929(2)       | x, y, z       | Fe2-Fe3     | 3.069(2)       | x, y, z       |
| Fe1-Fe3     | 3.327(2)       | x, y, z       | Fe2-Fe3'    | 3.905(3)       | -x, 1-y, 1-z  |
| Fe1-Fe3'    | 3.036(2)       | -x, 1-y, 1-z  | Fe3-Fe3'    | 3.079(2)       | -x, 1-y, 1-z  |
| Fe1-O1A     | 1.899(1)       | x, y, z       | Fe2-O1B-O4  | 176.18(6)      | x, y, z       |
| Fe1-O7      | 1.953(2)       | x, y, z       | Fe2-O1B-O8  | 95.38(5)       | x, y, z       |
| Fe1-O9      | 1.994(2)       | x, y, z       | Fe2-O1B-O9  | 96.55(4)       | x, y, z       |
| Fe1-O5      | 2.024(1)       | x, y, z       | Fe2-O1B-O6  | 92.51(5)       | x, y, z       |
| Fe1-O4      | 2.032(1)       | x, y, z       | Fe2-O1B-O2B | 85.86(5)       | x, y, z       |
| Fe1-O2A     | 2.161(1)       | x, y, z       | Fe2-O4-O8   | 80.90(4)       | x, y, z       |
| Fe2-O1B     | 1.930(2)       | x, y, z       | Fe2-O4-O9   | 84.35(5)       | x, y, z       |
| Fe2-O4      | 1.989(2)       | x, y, z       | Fe2-O4-O6   | 91.24(5)       | x, y, z       |
| Fe2-O8      | 1.997(1)       | x, y, z       | Fe2-O4-O2B  | 93.51(4)       | x, y, z       |
| Fe2-O9      | 1.999(1)       | x, y, z       | Fe2-O8-O9   | 89.44(4)       | x, y, z       |
| Fe2-O6      | 2.052(1)       | x, y, z       | Fe2-O8-O6   | 171.85(6)      | x, y, z       |
| Fe2-O2B     | 2.069(1)       | x, y, z       | Fe2-O8-O2B  | 94.24(4)       | x, y, z       |
| Fe3-O3A     | 1.900(1)       | x, y, z       | Fe2-O9-O6   | 87.62(4)       | x, y, z       |
| Fe3-O7      | 1.965(1)       | -x, 1-y, 1-z  | Fe2-O9-O2B  | 175.40(5)      | x, y, z       |
| Fe3-O8      | 1.992(2)       | x, y, z       | Fe2-O6-O2B  | 88.36(4)       | x, y, z       |
| Fe3-O4      | 2.009(2)       | -x, 1-y, 1-z  | Fe3-O3A-O7  | 98.23(4)       | -x, 1-y, 1-z  |
| Fe3-O4      | 2.053(1)       | x, y, z       | Fe3-O3A-O8  | 98.74(5)       | x, y, z       |
| Fe3-O2A     | 2.188(1)       | x, y, z       | Fe3-O3A-O4  | 104.15(5)      | -x, 1-y, 1-z  |
| Fe1-O1A-O7  | 97.27(5)       | x, y, z       | Fe3-O3A-O4  | 157.51(5)      | x, y, z       |
| Fe1-O1A-O9  | 98.83(4)       | x, y, z       | Fe3-O3A-O2A | 82.87(4)       | x, y, z       |
| Fe1-O1A-O5  | 102.73(4)      | x, y, z       | Fe3-O7-O8   | 91.02(5)       | x, y, z       |
| Fe1-O1A-O4  | 159.98(5)      | x, y, z       | Fe3-O7-O4   | 80.47(4)       | -x, 1-y, 1-z  |
| Fe1-O1A-O2A | 84.33(4)       | x, y, z       | Fe3-O7-O4   | 104.21(5)      | x, y, z       |



|            |           |         |             |           |              |
|------------|-----------|---------|-------------|-----------|--------------|
| Fe1-07-09  | 163.45(6) | x, y, z | Fe3-07-O2A  | 175.49(5) | x, y, z      |
| Fe1-07-05  | 93.50(5)  | x, y, z | Fe3-08-04   | 156.47(6) | -x, 1-y, 1-z |
| Fe1-07-04  | 80.19(4)  | x, y, z | Fe3-08-04   | 79.45(4)  | x, y, z      |
| Fe1-07-O2A | 91.18(5)  | x, y, z | Fe3-08-O2A  | 93.14(4)  | x, y, z      |
| Fe1-09-05  | 86.71(5)  | x, y, z | Fe3-04-04   | 81.44(5)  | x, y, z      |
| Fe1-09-04  | 83.36(5)  | x, y, z | Fe3-04-O2A  | 95.02(5)  | x, y, z      |
| Fe1-09-O2A | 86.60(4)  | x, y, z | Fe3-04-O2A  | 74.90(4)  | x, y, z      |
| Fe1-05-04  | 97.25(5)  | x, y, z | Fe1-04- O2A | 75.92(4)  | x, y, z      |
| Fe1-05-O2A | 170.95(5) | x, y, z |             |           |              |
